# Supplementary material for: A reported 20-gene expression signature to predict lymph node-positive disease at radical cystectomy for muscle-invasive bladder cancer is clinically not applicable
Source: PubMed Central journal article supplement (PMC5358850; doi:10.1371/journal.pone.0174039), 2017-03-20

TCGA TOX3 N= 365  
Mann-Whitney U p-value 0.71

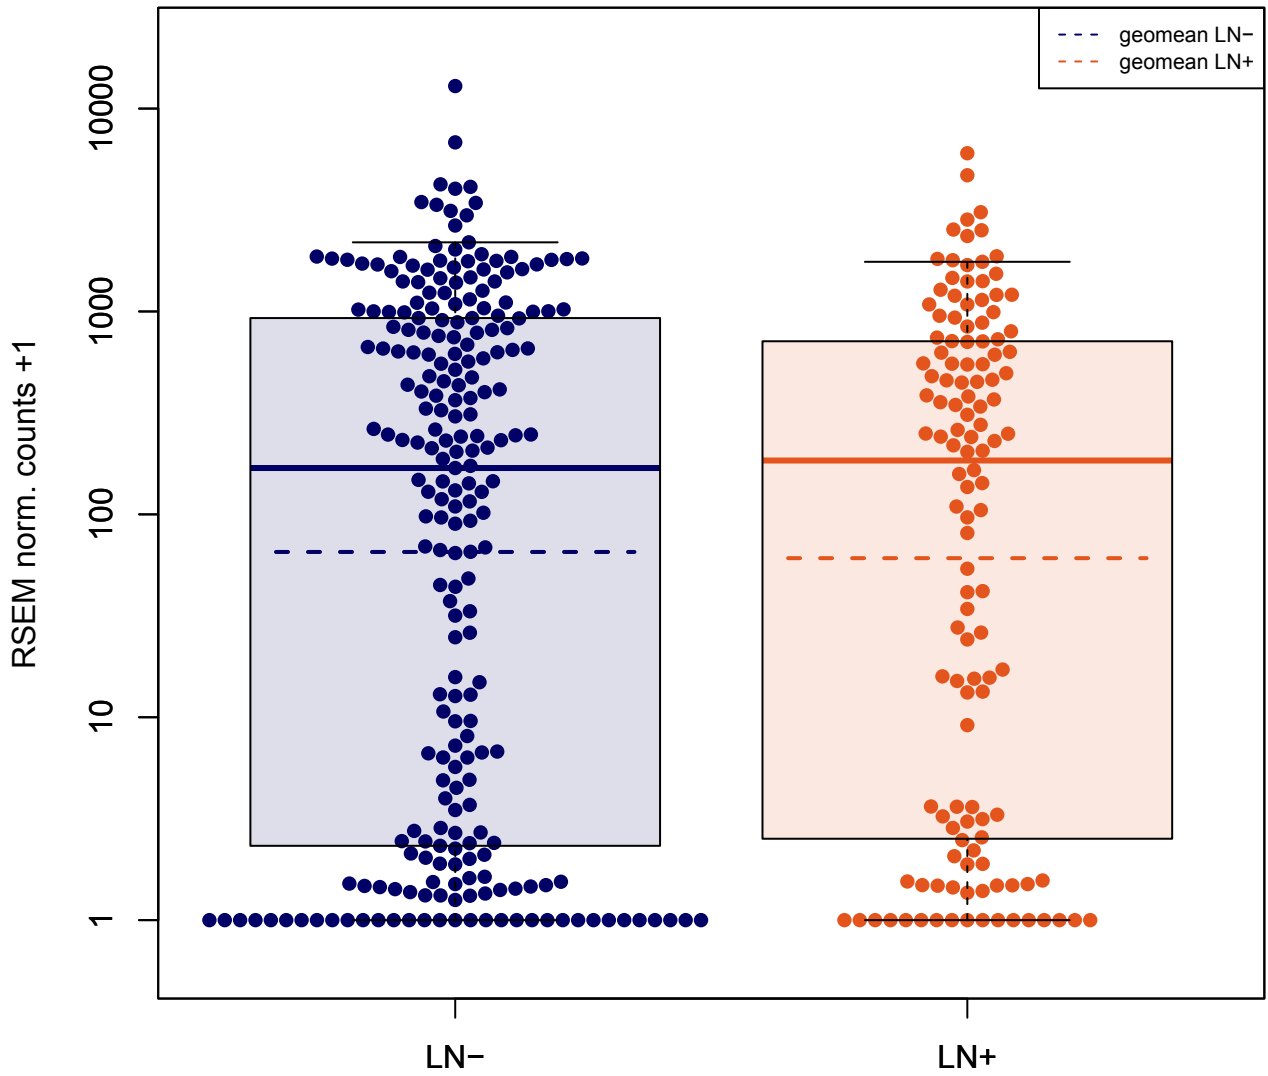

TCGA SLC11A2 N= 365  
Mann-Whitney U p-value 0.76

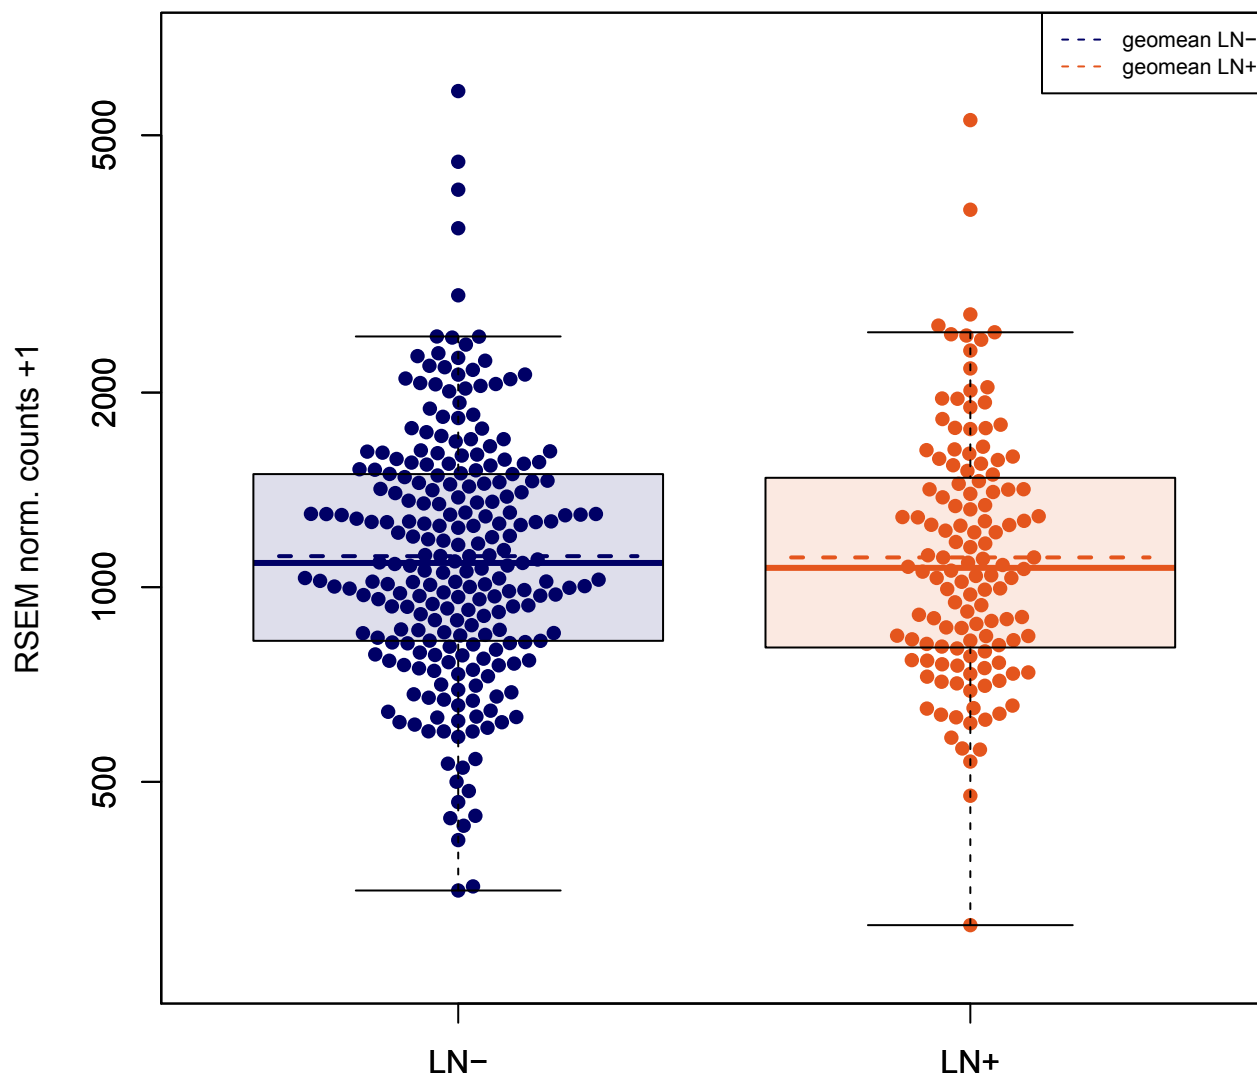

TCGA FAM36A/COX20 N= 365

Mann-Whitney U p-value 0.11

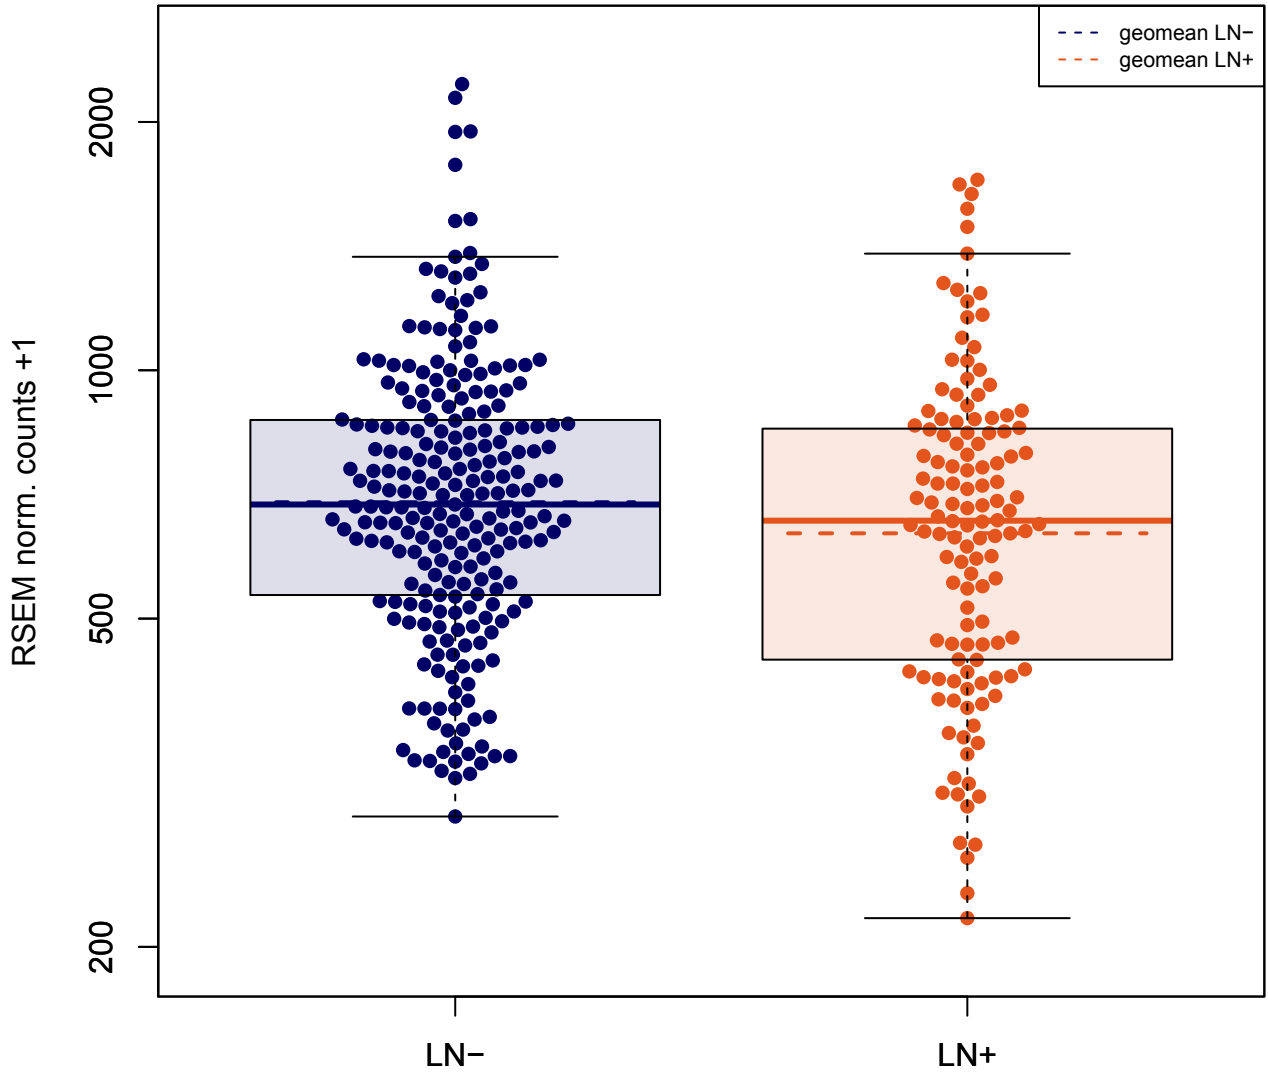

TCGA LIMCH1 N= 365  
Mann-Whitney U p-value 0.71

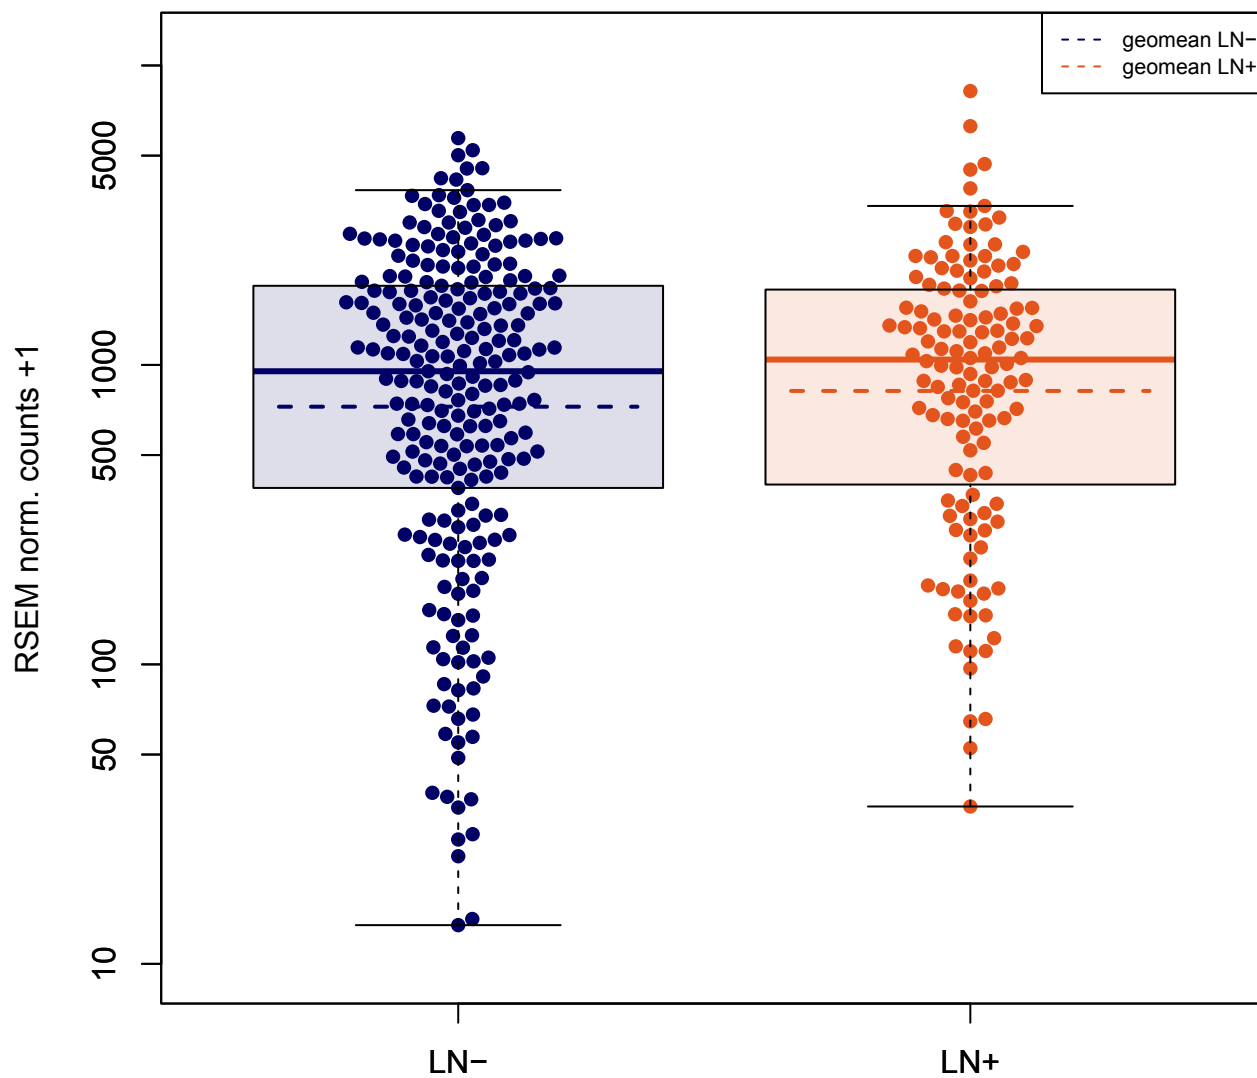

TCGA RAB15 N= 365

Mann-Whitney U p-value 0.83

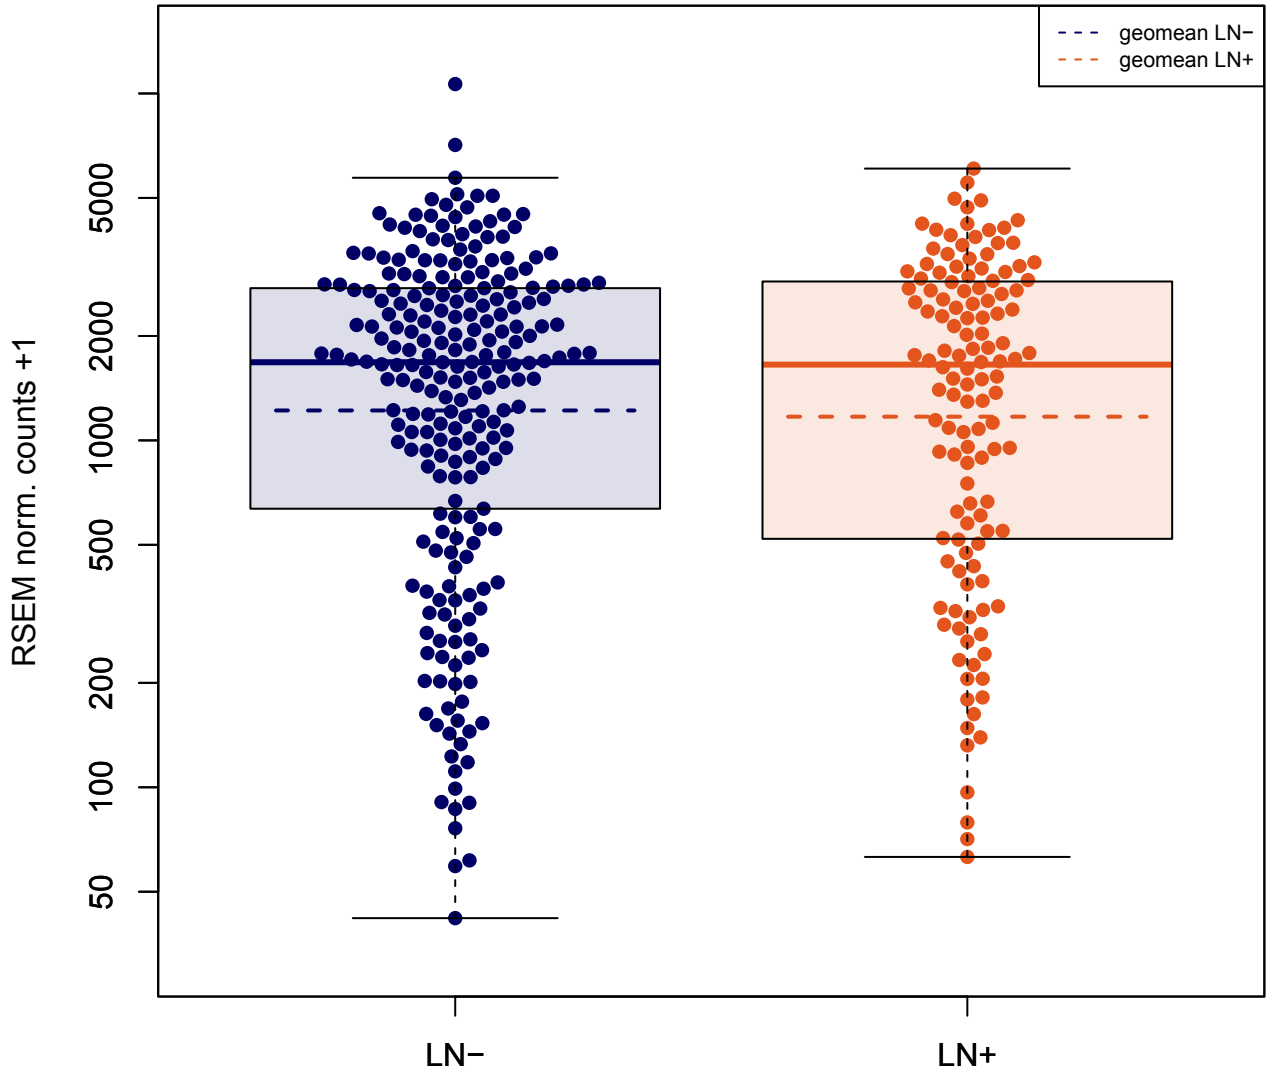

TCGA AVL9 N= 365

Mann-Whitney U p-value 0.29

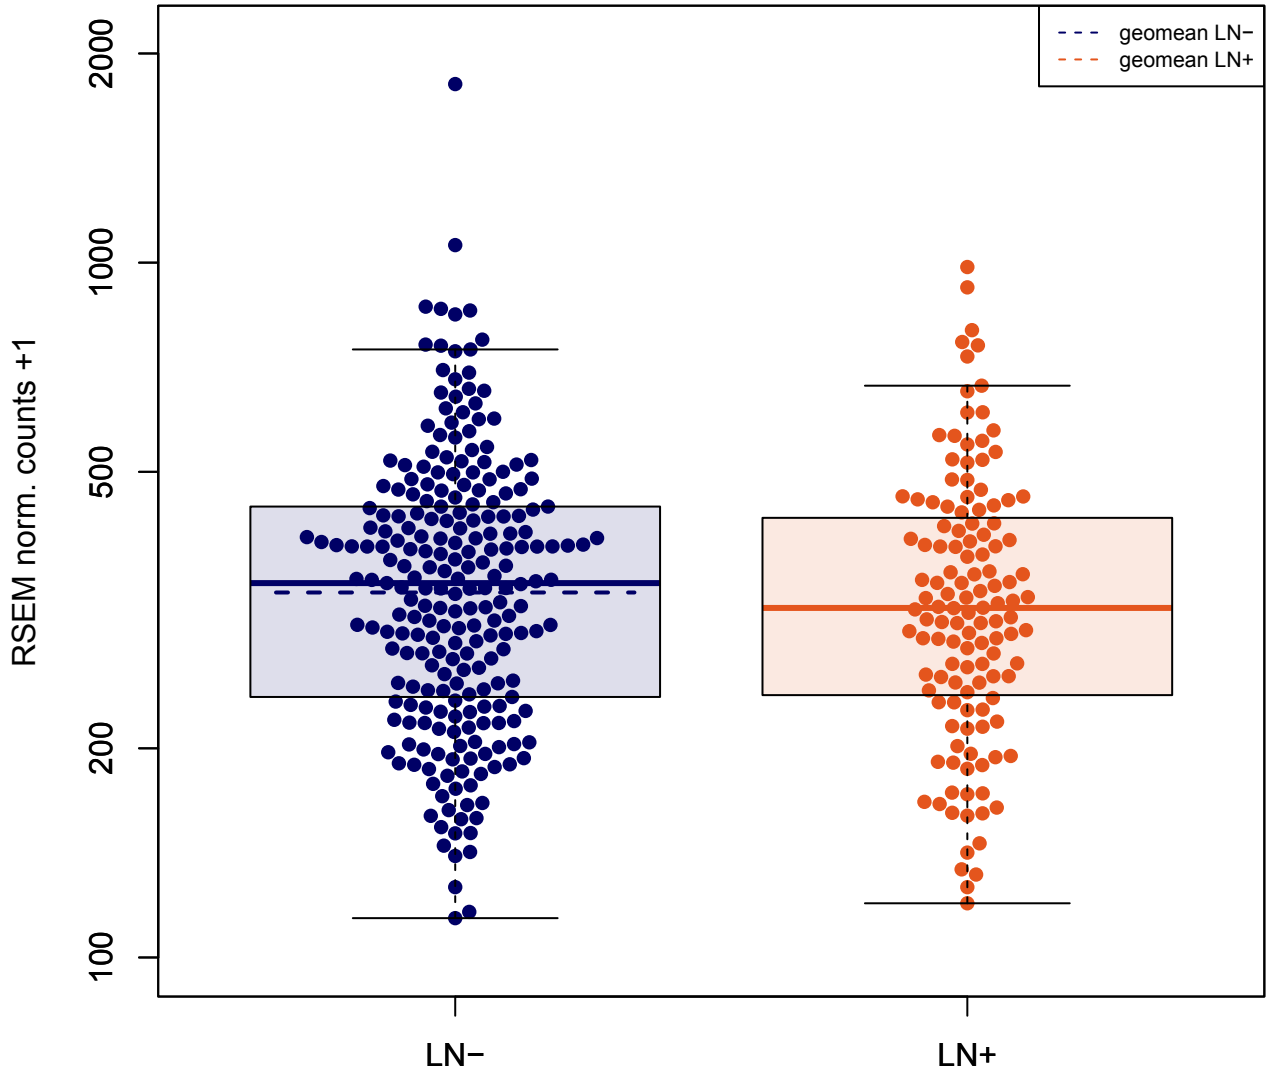

TCGA PCMTD2 N= 365  
Mann-Whitney U p-value 0.33

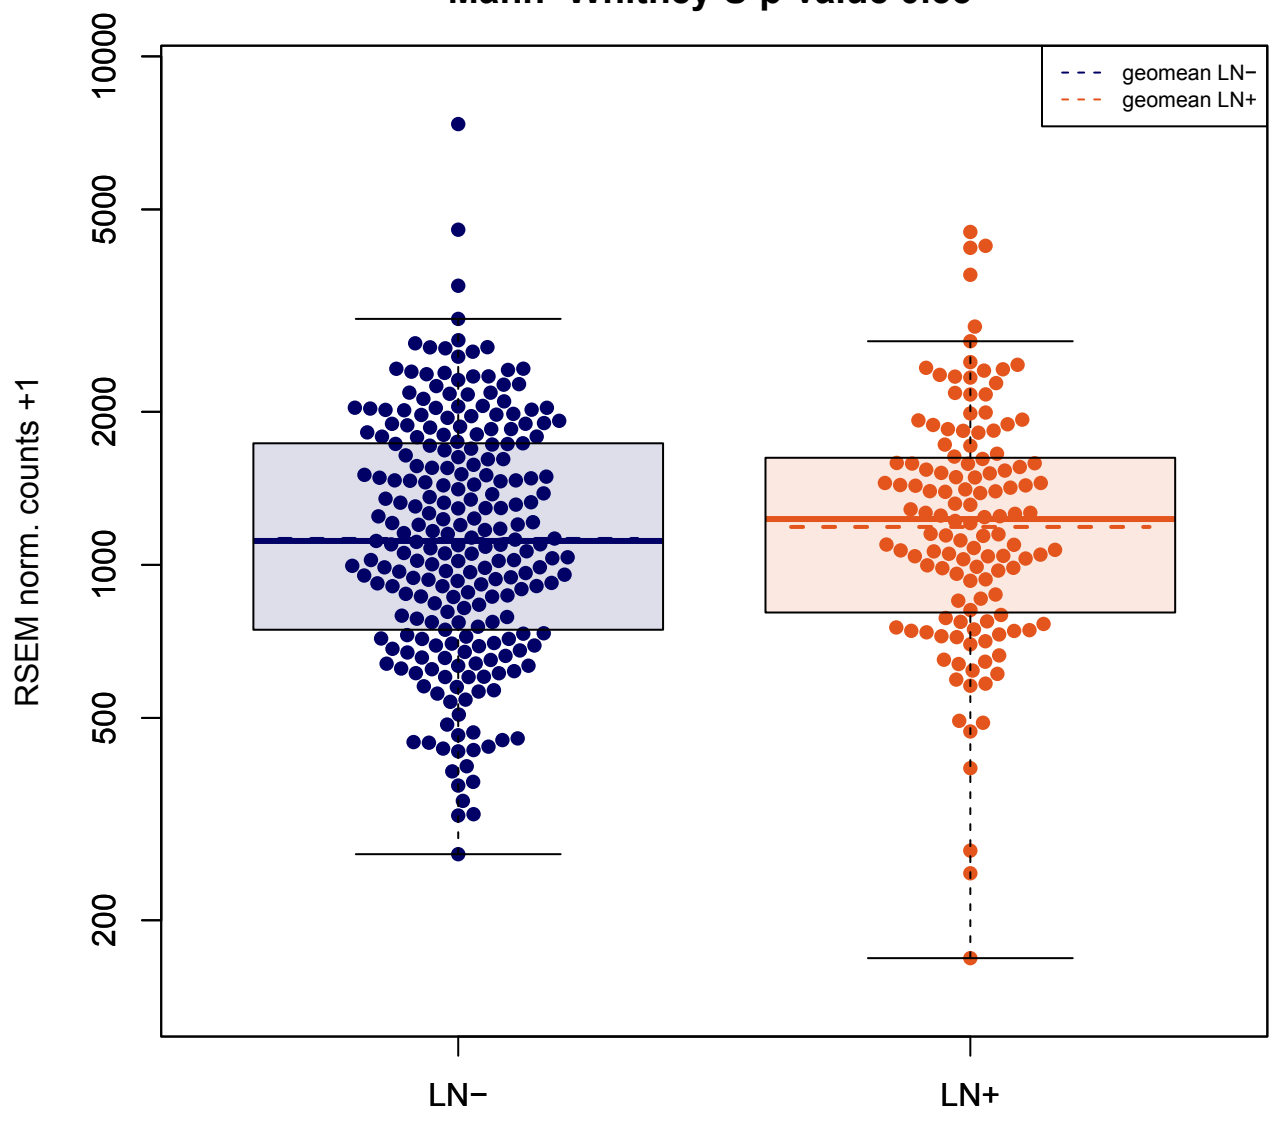

TCGA PTHLH N= 365  
Mann-Whitney U p-value 0.52

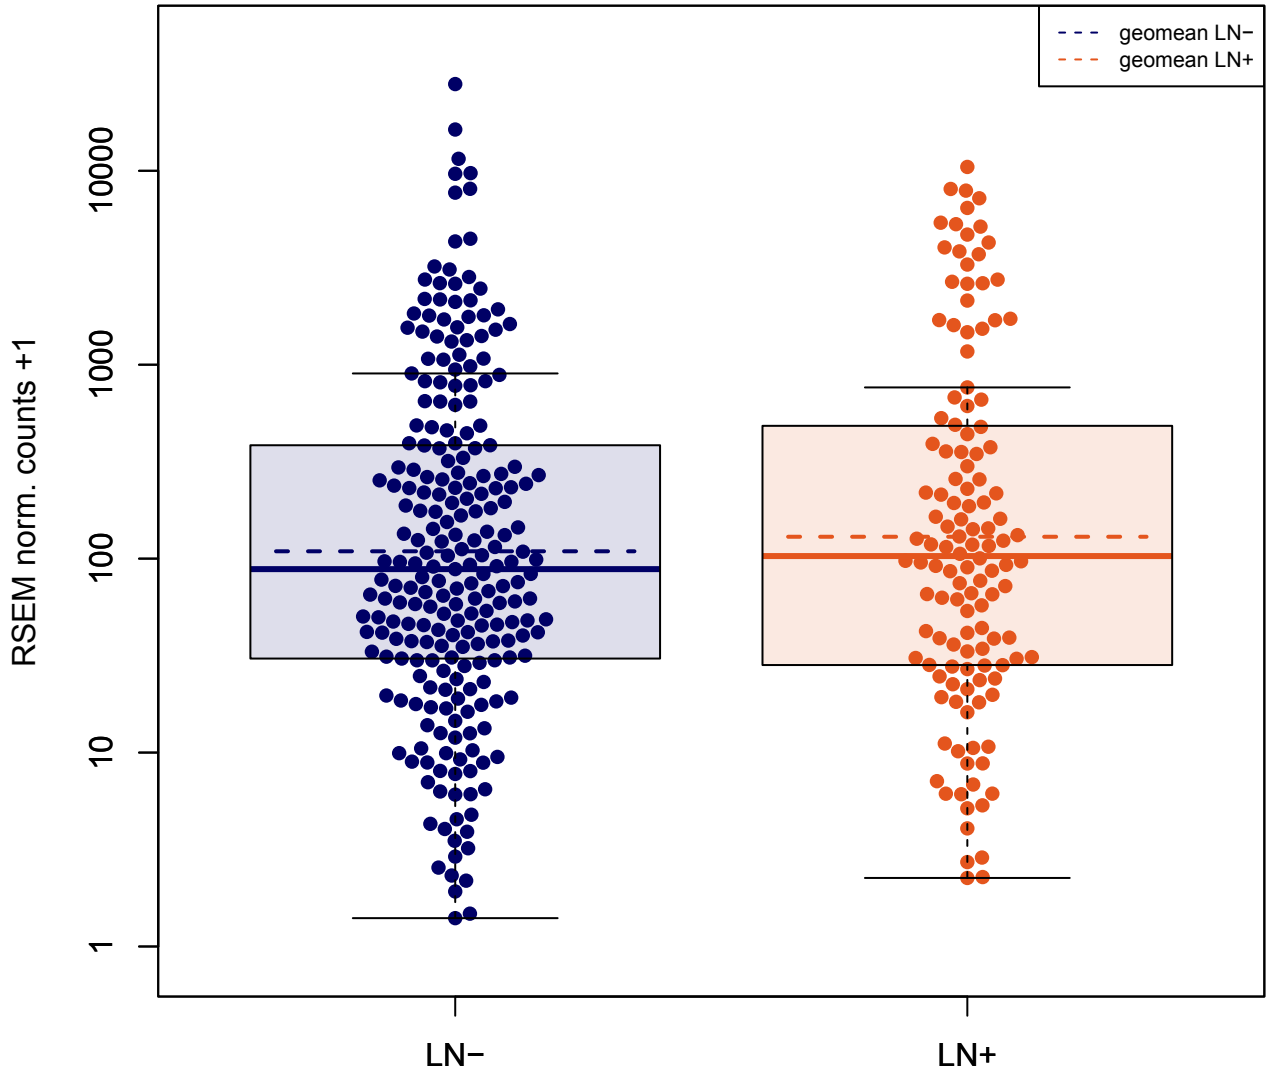



**TCGA DPP4 N= 365**  
**Mann-Whitney U p-value 0.93**

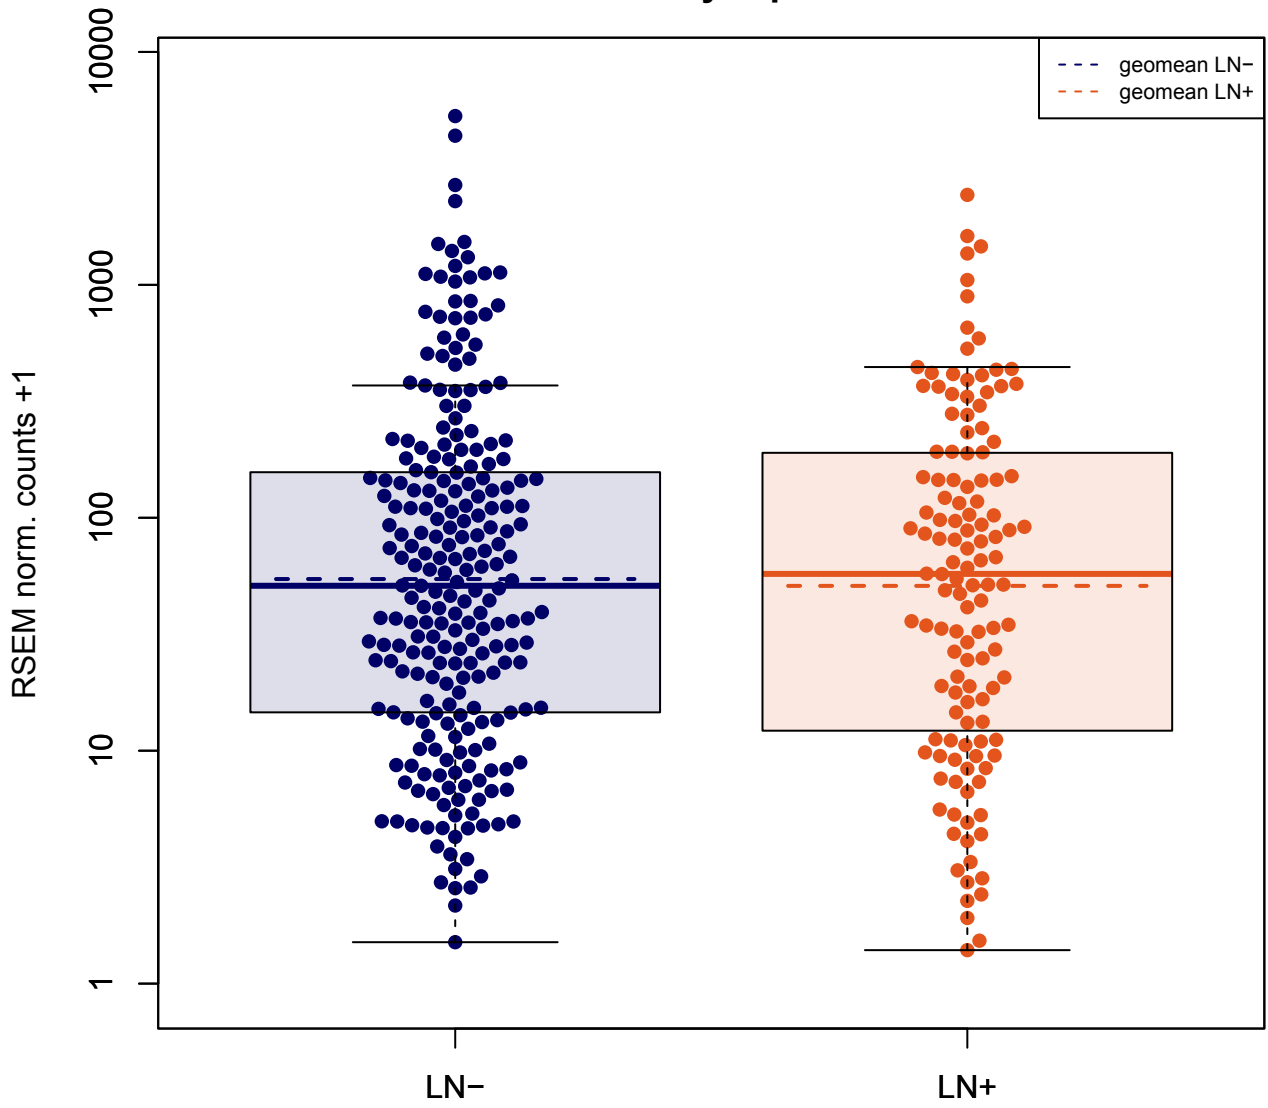

TCGA PCDHGA10 N= 365  
Mann-Whitney U p-value 0.07

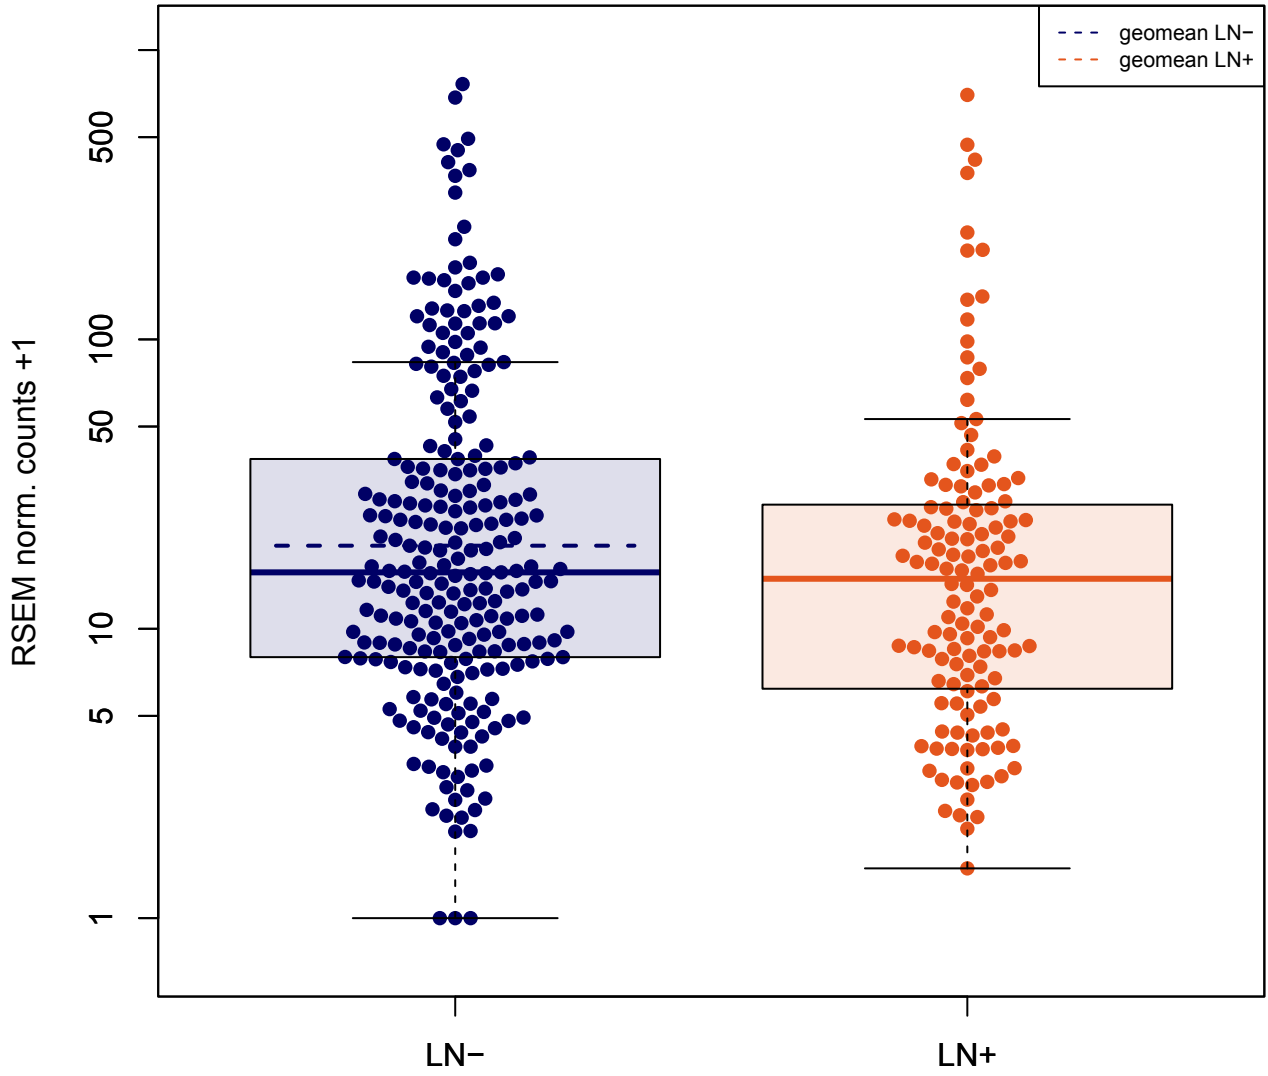

TCGA MT1E N= 365  
Mann-Whitney U p-value 0.51

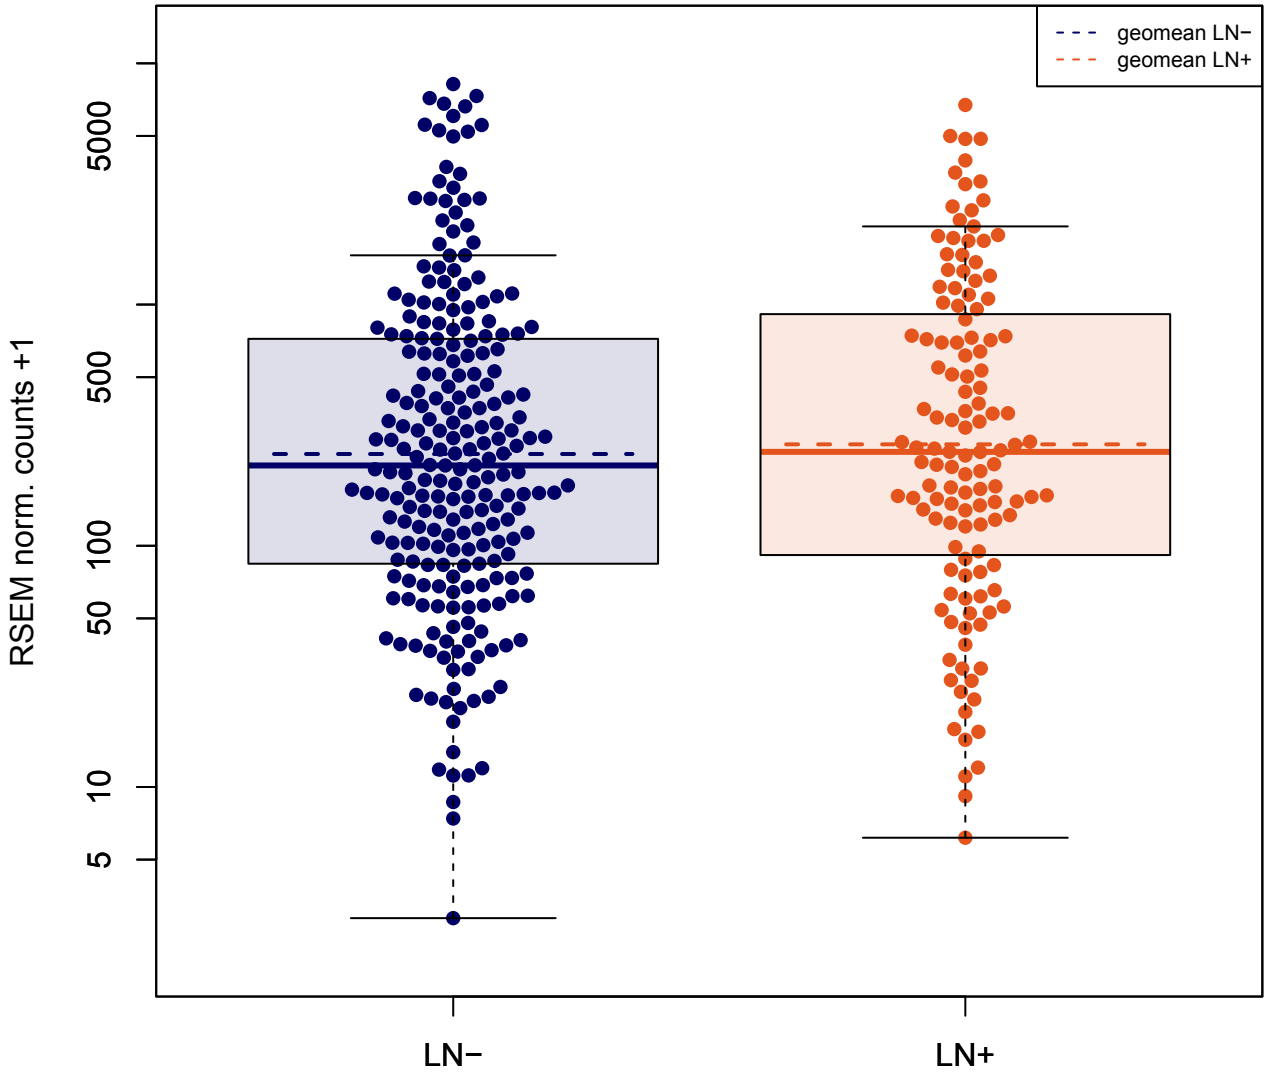

TCGA MAP4K4 N= 365  
Mann-Whitney U p-value 0.67

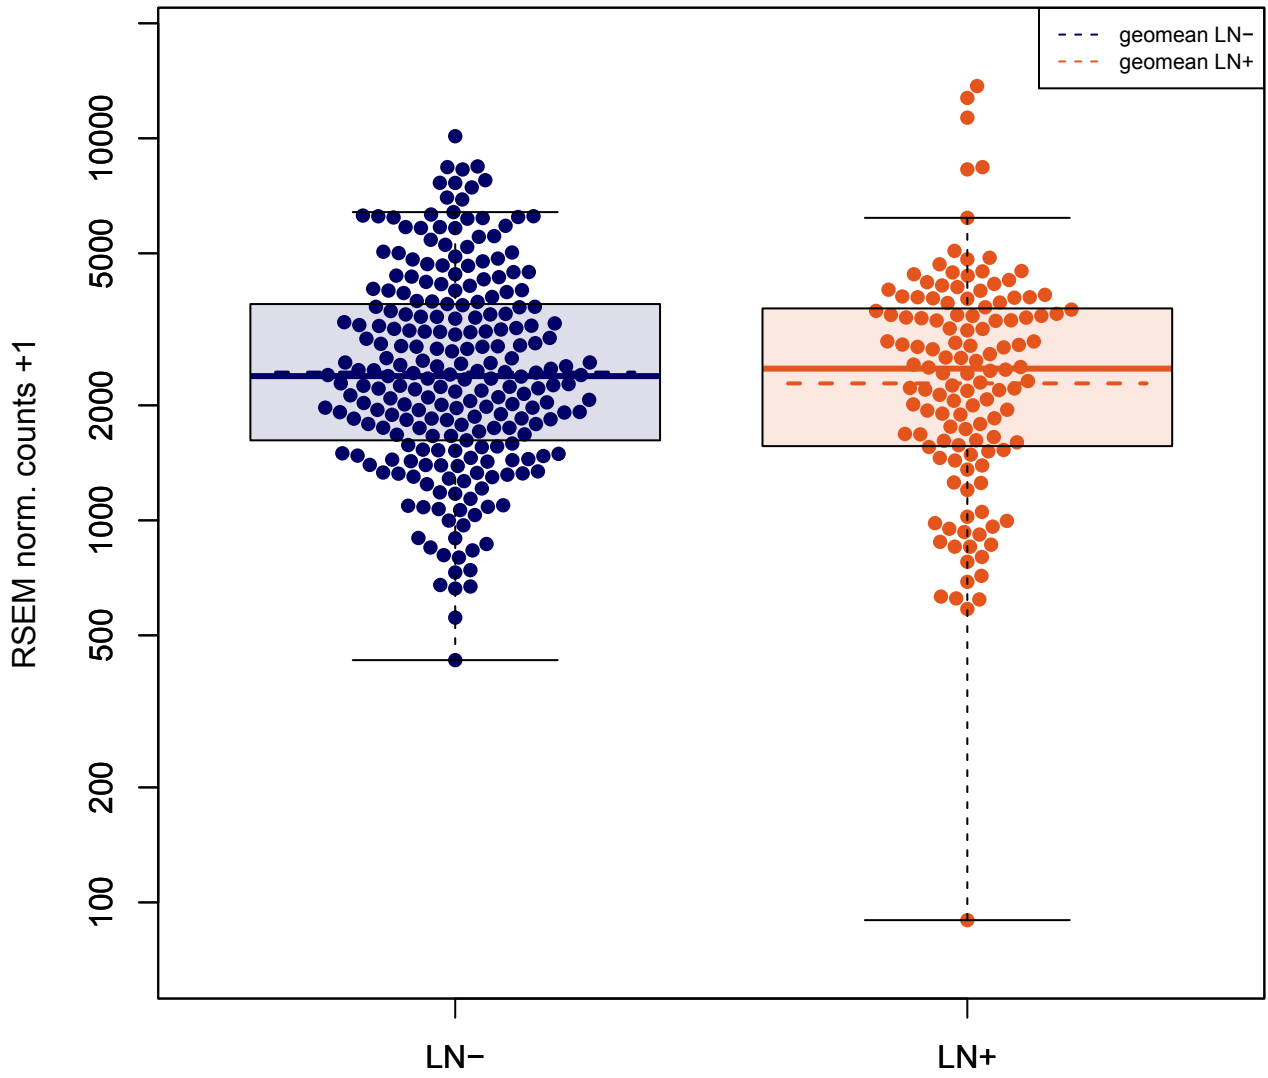

TCGA SLC16A1 N= 365  
Mann-Whitney U p-value 0.84

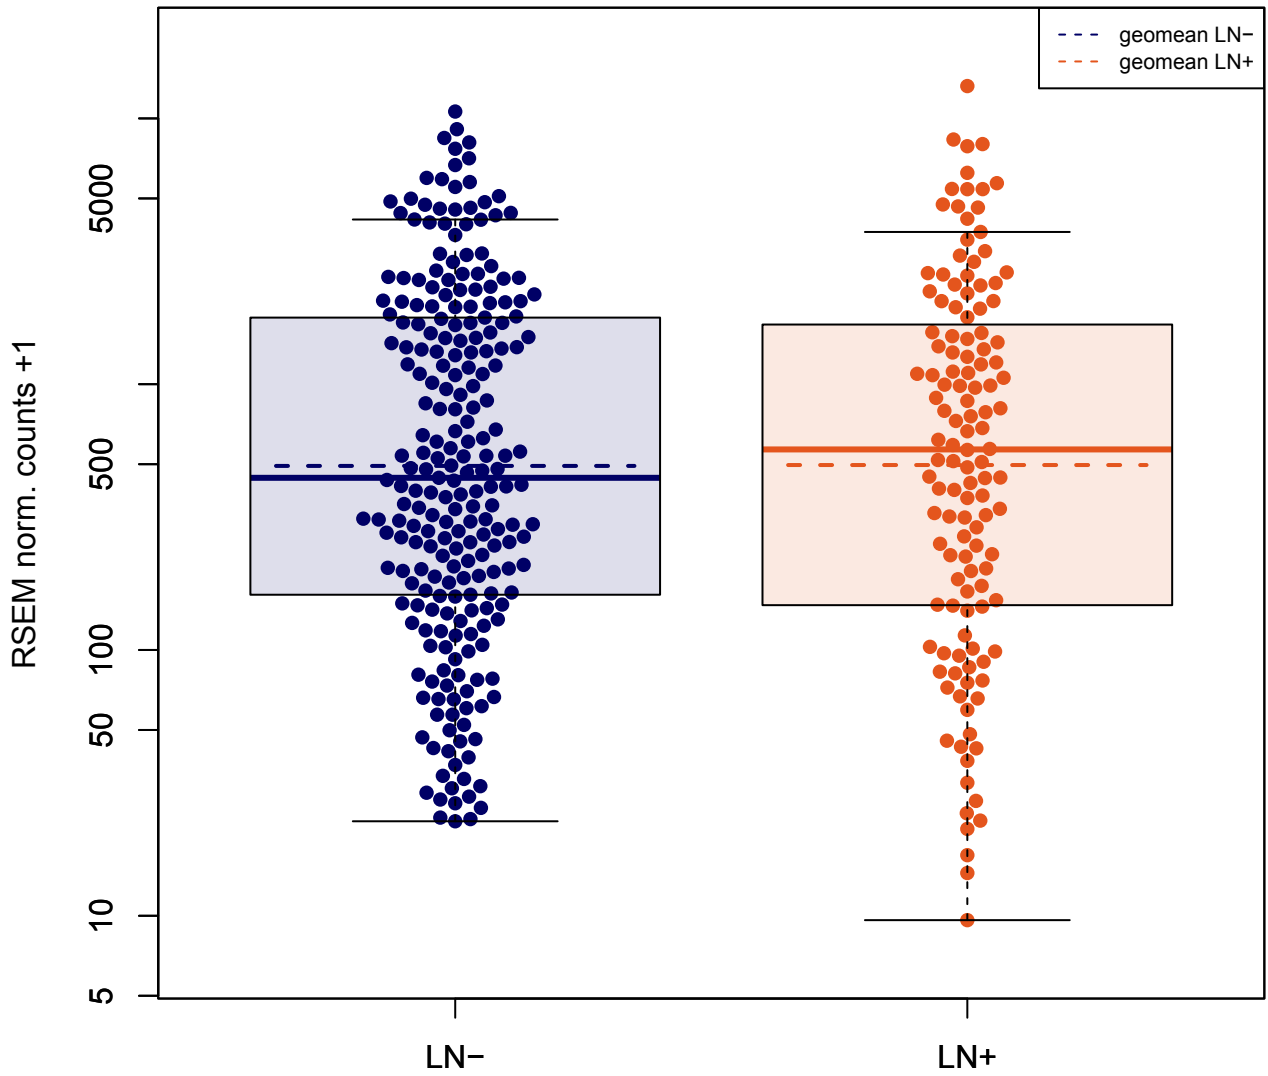

TCGA BST2 N= 365  
Mann-Whitney U p-value 0.67

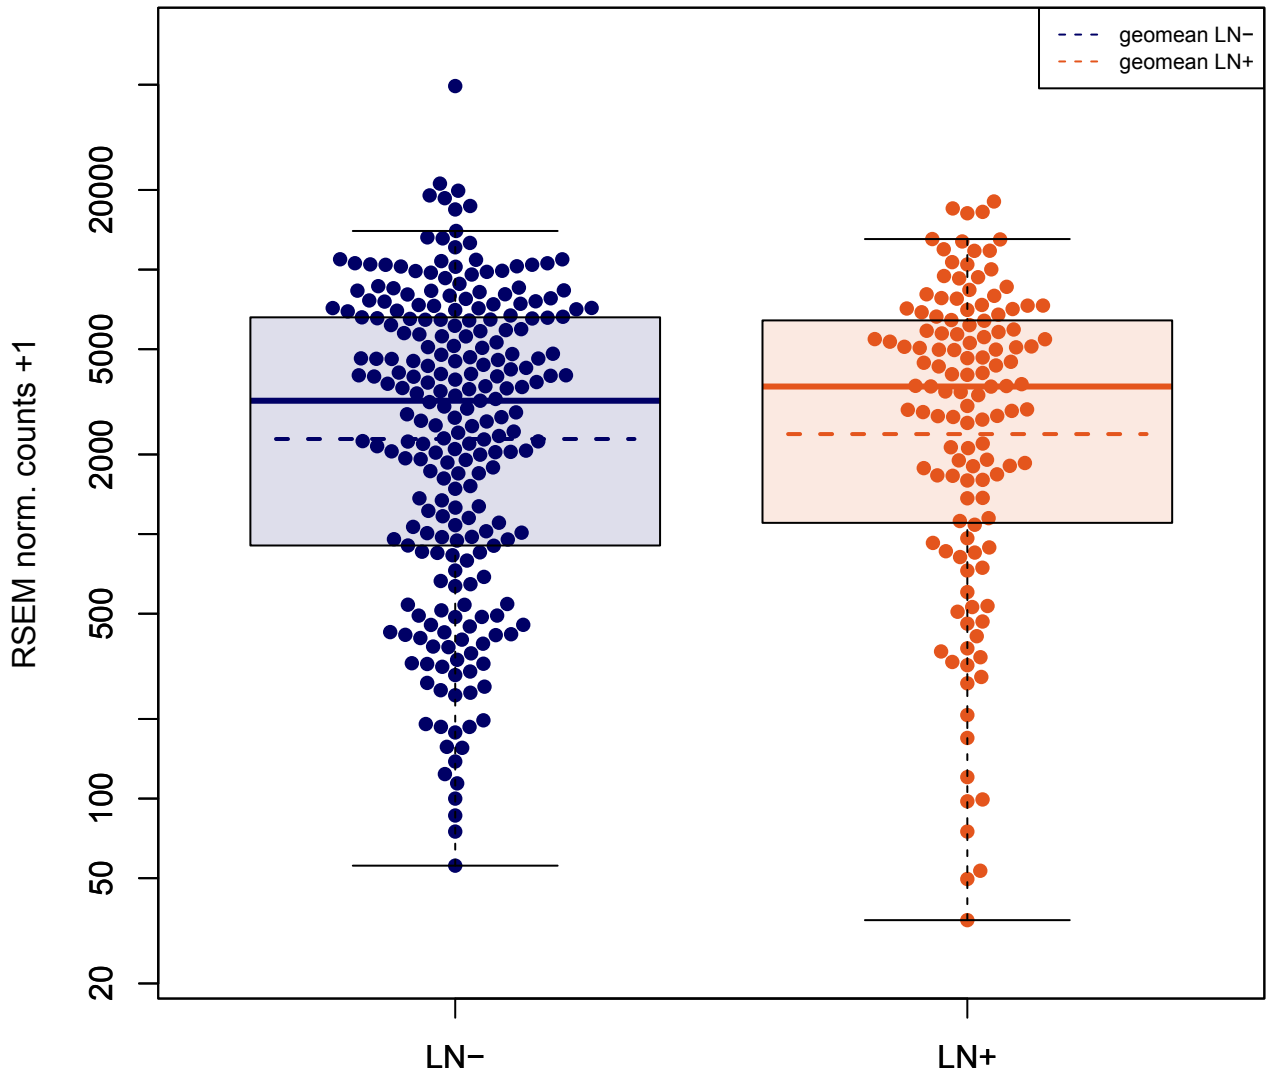

TCGA MMP14 N= 365  
Mann-Whitney U p-value 0.78

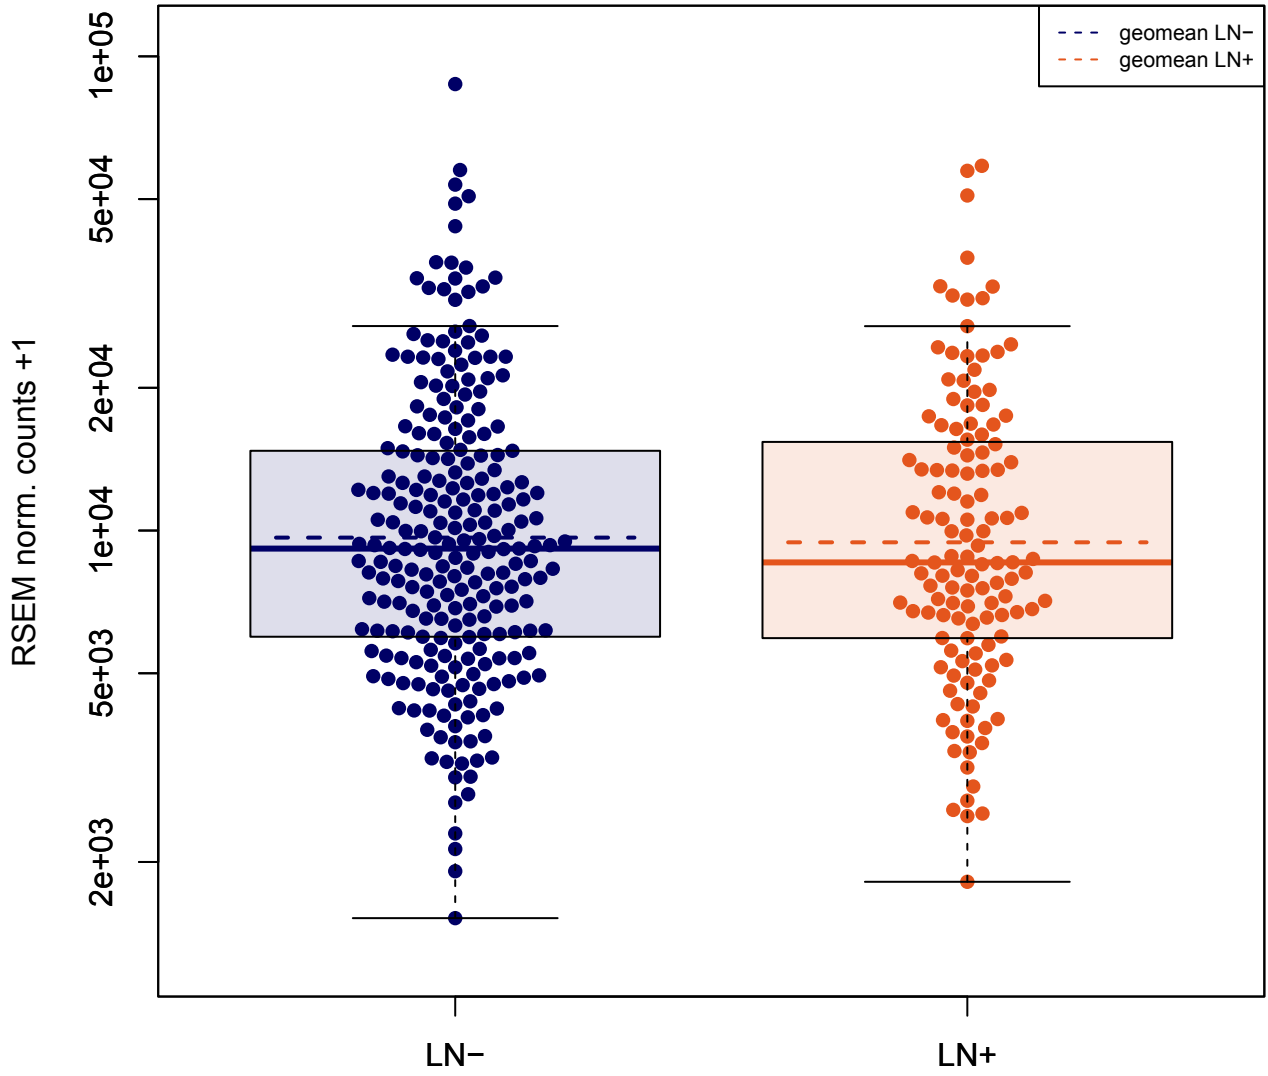

TCGA IFI27 N= 365  
Mann-Whitney U p-value 0.48

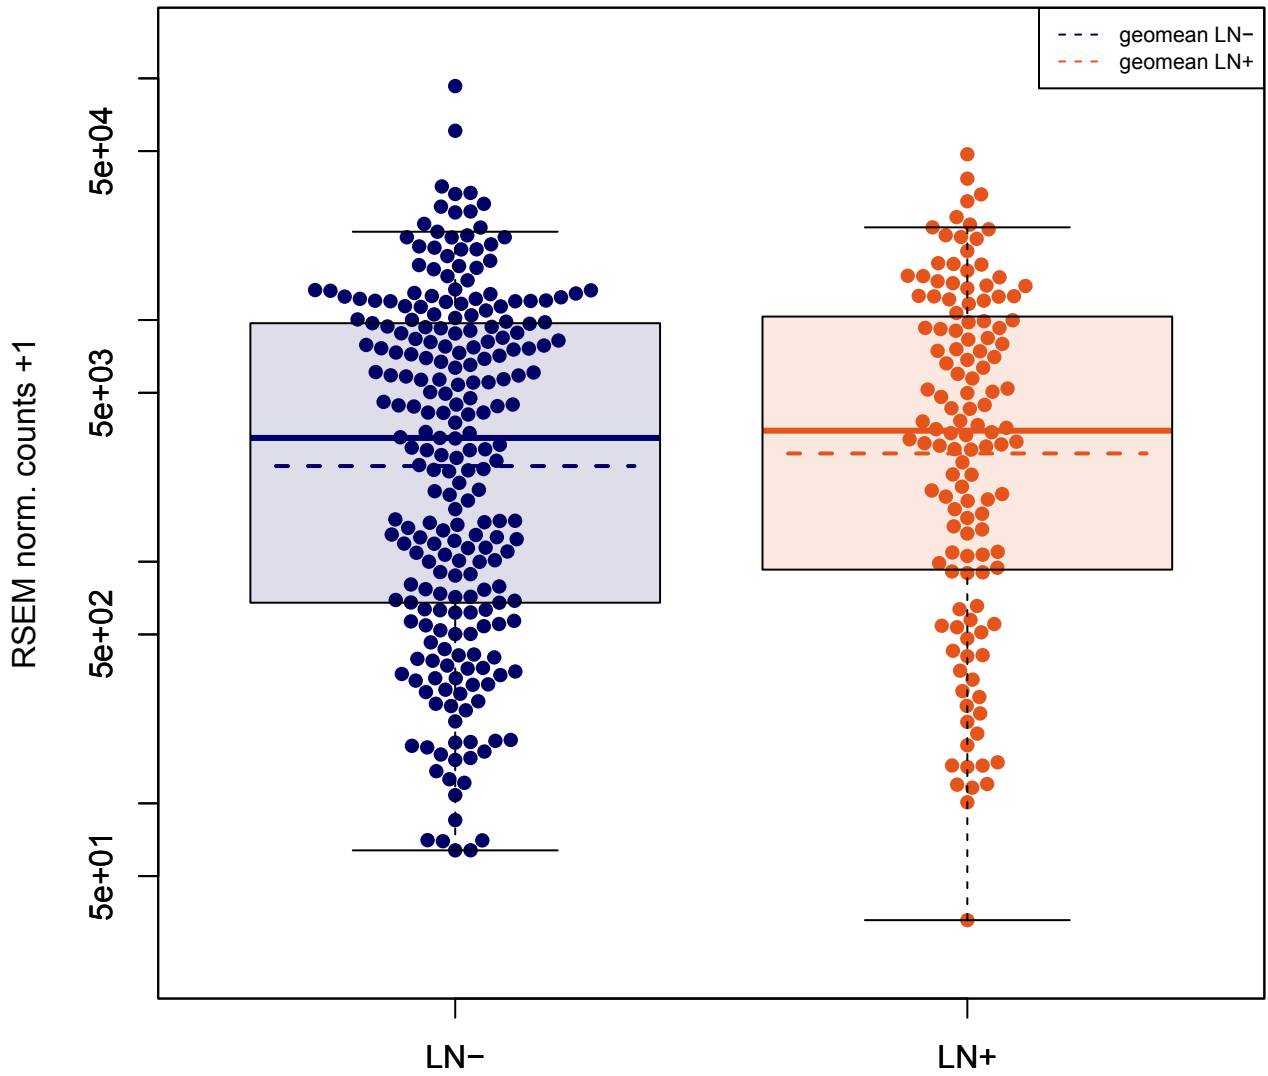



TCGA NCLN N= 365  
Mann-Whitney U p-value 0.52

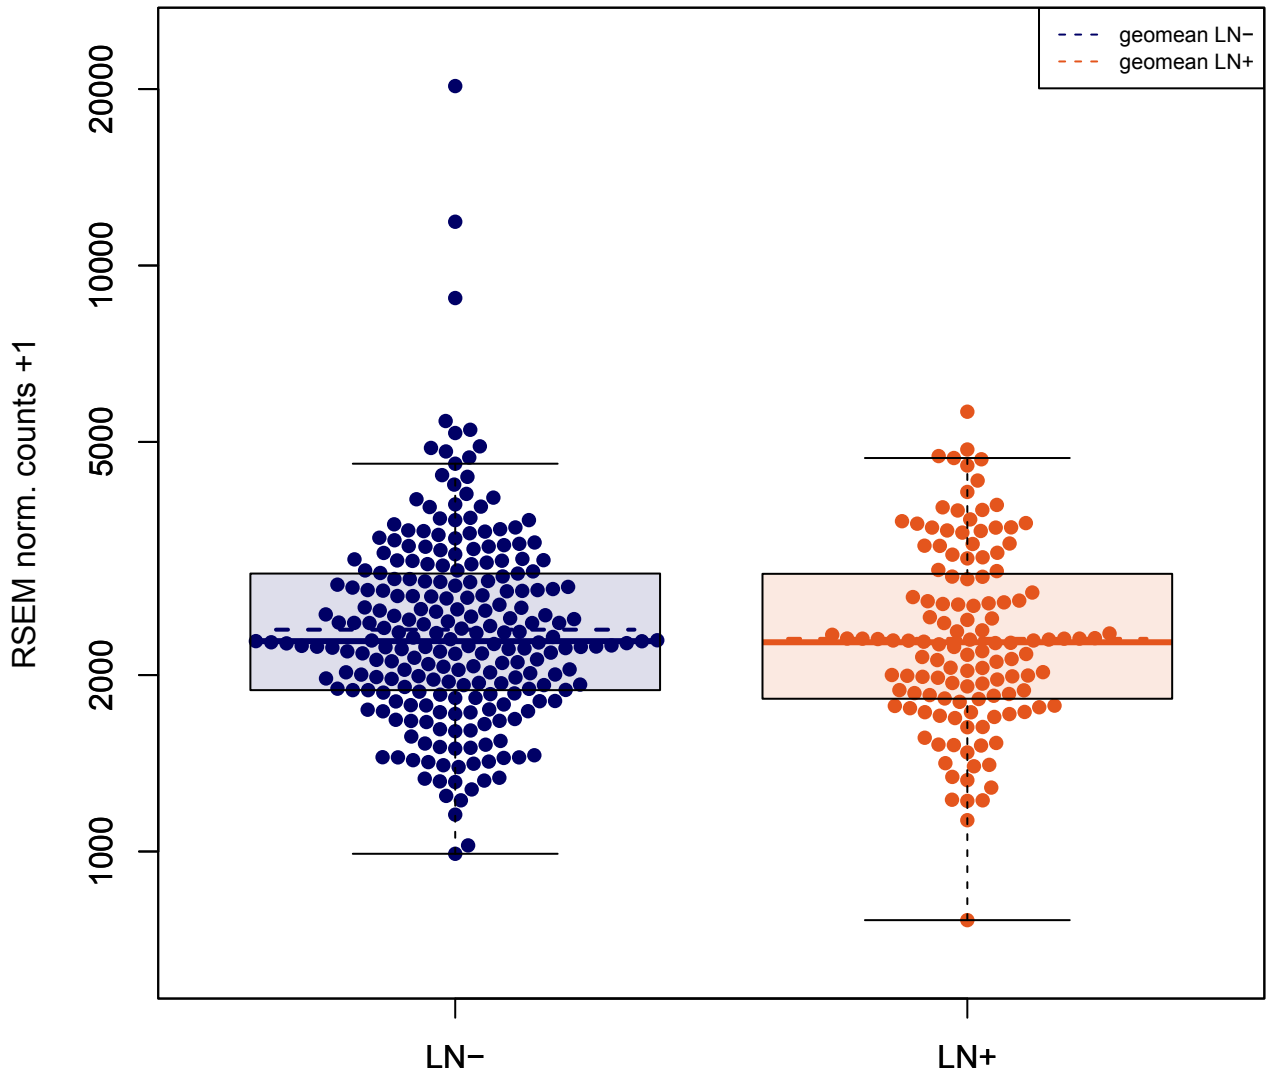

TCGA RRBP1 N= 365  
Mann-Whitney U p-value 0.85

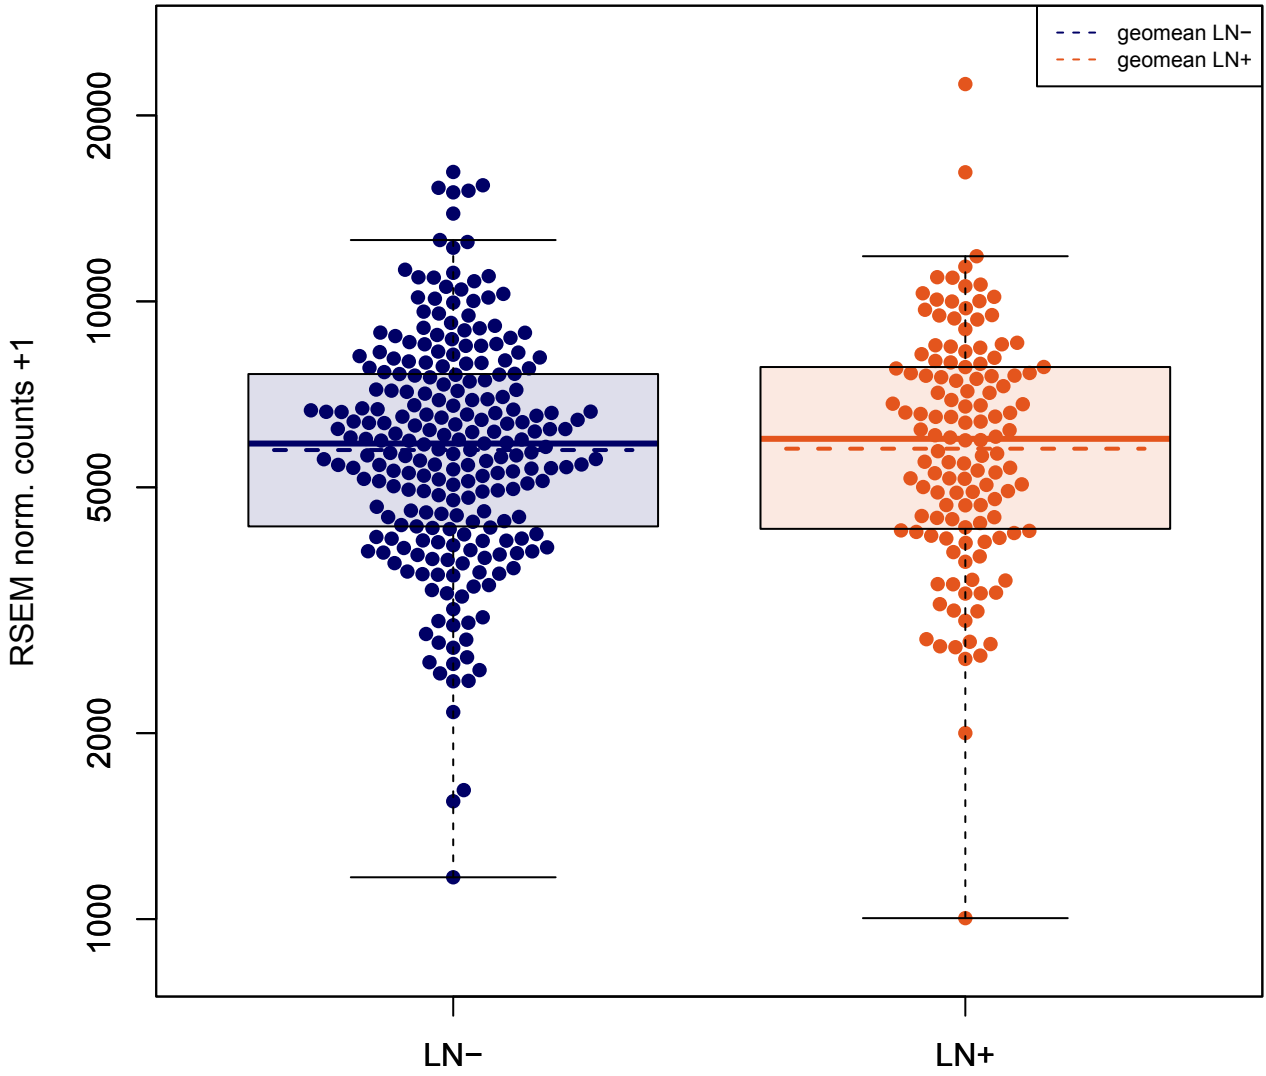

TCGA ICAM1 N= 365  
Mann-Whitney U p-value 0.68

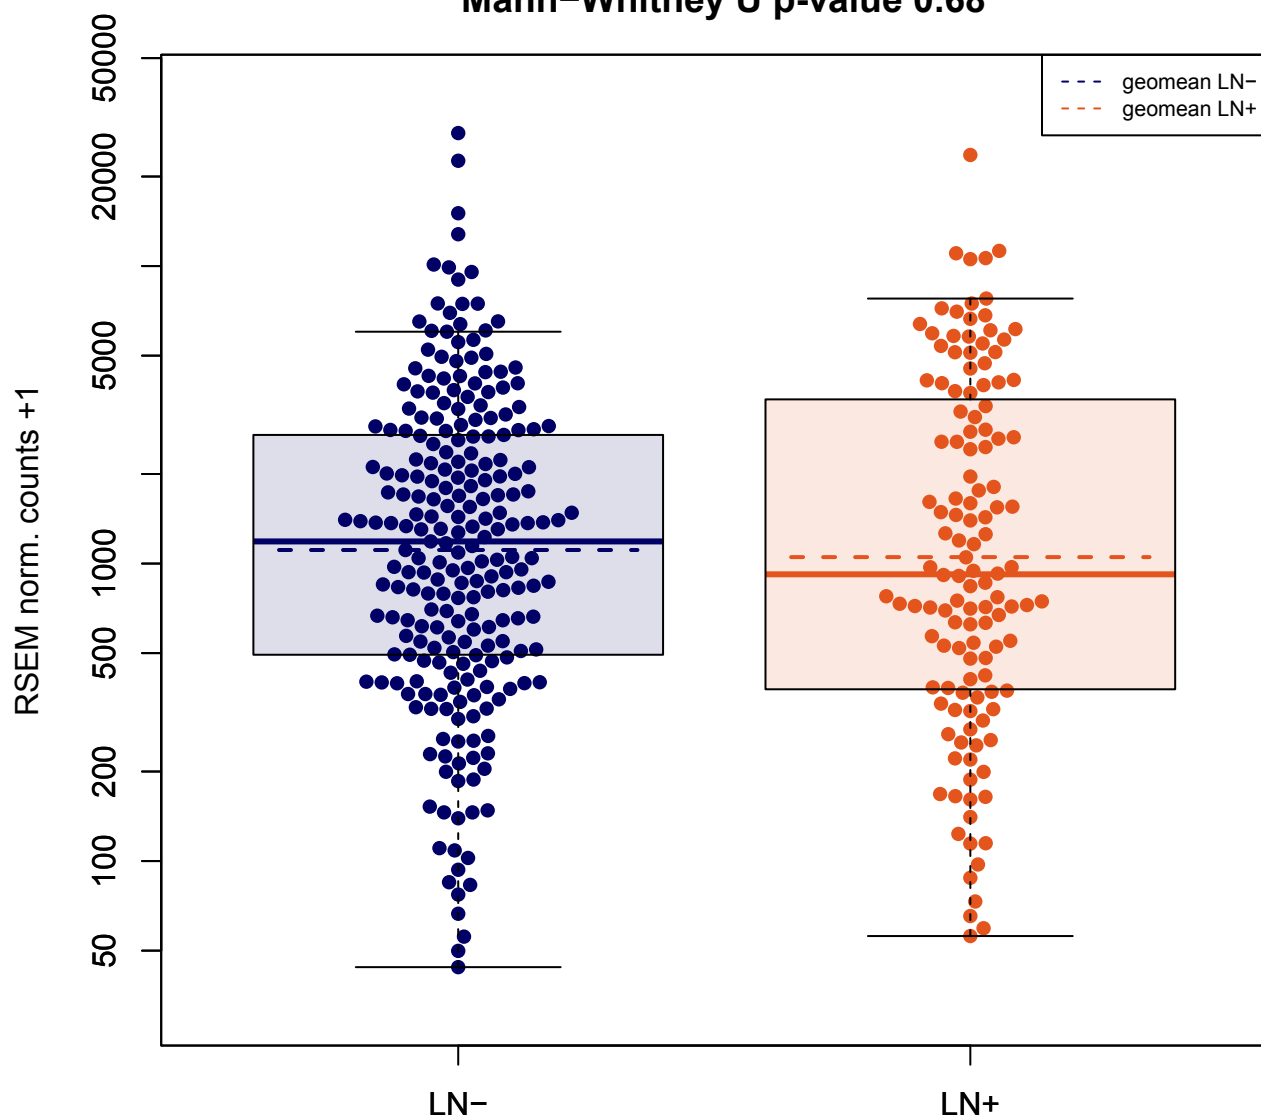

TCGA HLA.G N= 365  
Mann-Whitney U p-value 0.45

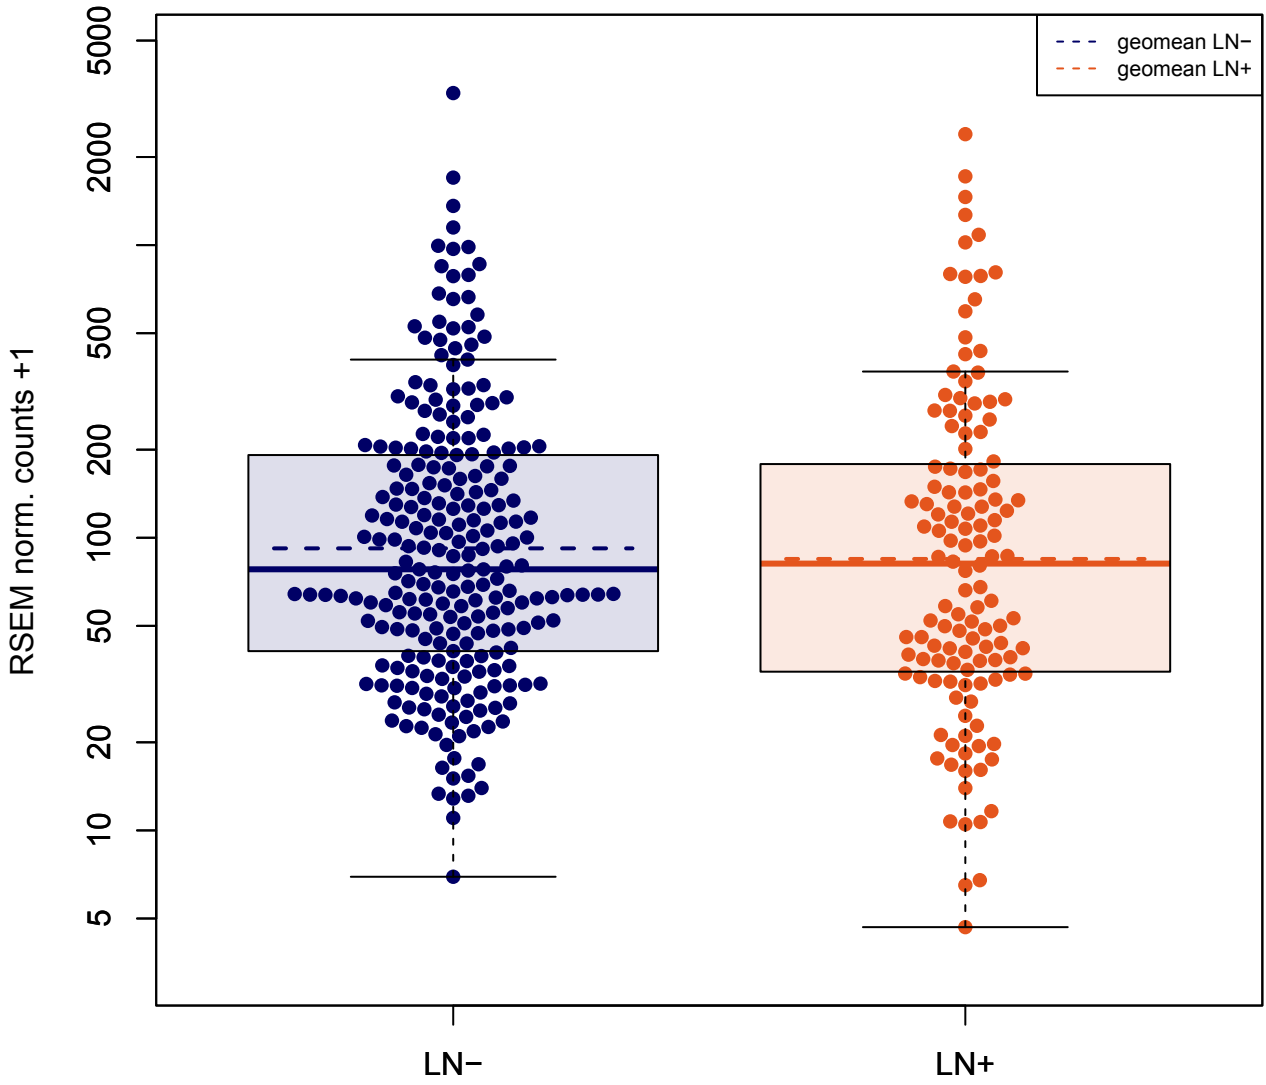

Supplement: pone.0174039.s004.pdf [file pone.0174039.s004.pdf]
