# Supplementary material for: A reported 20-gene expression signature to predict lymph node-positive disease at radical cystectomy for muscle-invasive bladder cancer is clinically not applicable
Source: PubMed Central journal article supplement (PMC5358850; doi:10.1371/journal.pone.0174039), 2017-03-20
Supplement: pone.0174039.s001.pdf [file pone.0174039.s001.pdf]

|          | 1       | 2     | 3     | 4      | 5     | 6     | 7      | 8     | 9    | 10       | 11       | 12       | sample    |
|----------|---------|-------|-------|--------|-------|-------|--------|-------|------|----------|----------|----------|-----------|
| <b>A</b> | SLC11A2 | COX20 | TOX3  | LIMCH1 | RAB15 | AVL9  | PCMTD2 | PTHLH | DPP4 | PCDHGA10 | MT1E     | MAP4K4   | <b>1a</b> |
| <b>B</b> | SLC16A1 | BST2  | MMP14 | IFI27  | NCLN  | HLA-G | RRBP1  | ICAM1 | ACTB | HPRT     |          |          | <b>1a</b> |
| <b>C</b> | SLC11A2 | COX20 | TOX3  | LIMCH1 | RAB15 | AVL9  | PCMTD2 | PTHLH | DPP4 | PCDHGA10 | MT1E     | MAP4K4   | <b>1b</b> |
| <b>D</b> | SLC16A1 | BST2  | MMP14 | IFI27  | NCLN  | HLA-G | RRBP1  | ICAM1 | ACTB | HPRT     | T24 HPRT | nt HPRT  | <b>1b</b> |
| <b>E</b> | SLC11A2 | COX20 | TOX3  | LIMCH1 | RAB15 | AVL9  | PCMTD2 | PTHLH | DPP4 | PCDHGA10 | MT1E     | MAP4K4   | <b>2a</b> |
| <b>F</b> | SLC16A1 | BST2  | MMP14 | IFI27  | NCLN  | HLA-G | RRBP1  | ICAM1 | ACTB | HPRT     |          |          | <b>2a</b> |
| <b>G</b> | SLC11A2 | COX20 | TOX3  | LIMCH1 | RAB15 | AVL9  | PCMTD2 | PTHLH | DPP4 | PCDHGA10 | MT1E     | MAP4K4   | <b>2b</b> |
| <b>H</b> | SLC16A1 | BST2  | MMP14 | IFI27  | NCLN  | HLA-G | RRBP1  | ICAM1 | ACTB | HPRT     | T24 HPRT | T24 HPRT | <b>2b</b> |
