# Supplementary material for: A reported 20-gene expression signature to predict lymph node-positive disease at radical cystectomy for muscle-invasive bladder cancer is clinically not applicable
Source: PubMed Central journal article supplement (PMC5358850; doi:10.1371/journal.pone.0174039), 2017-03-20

# corplot N = 408

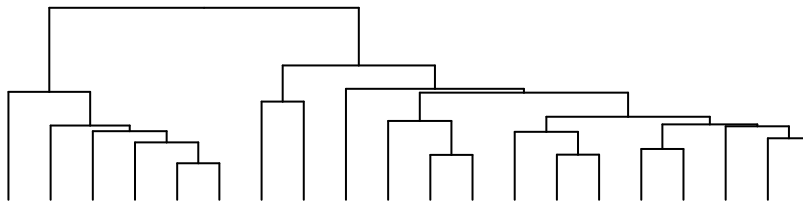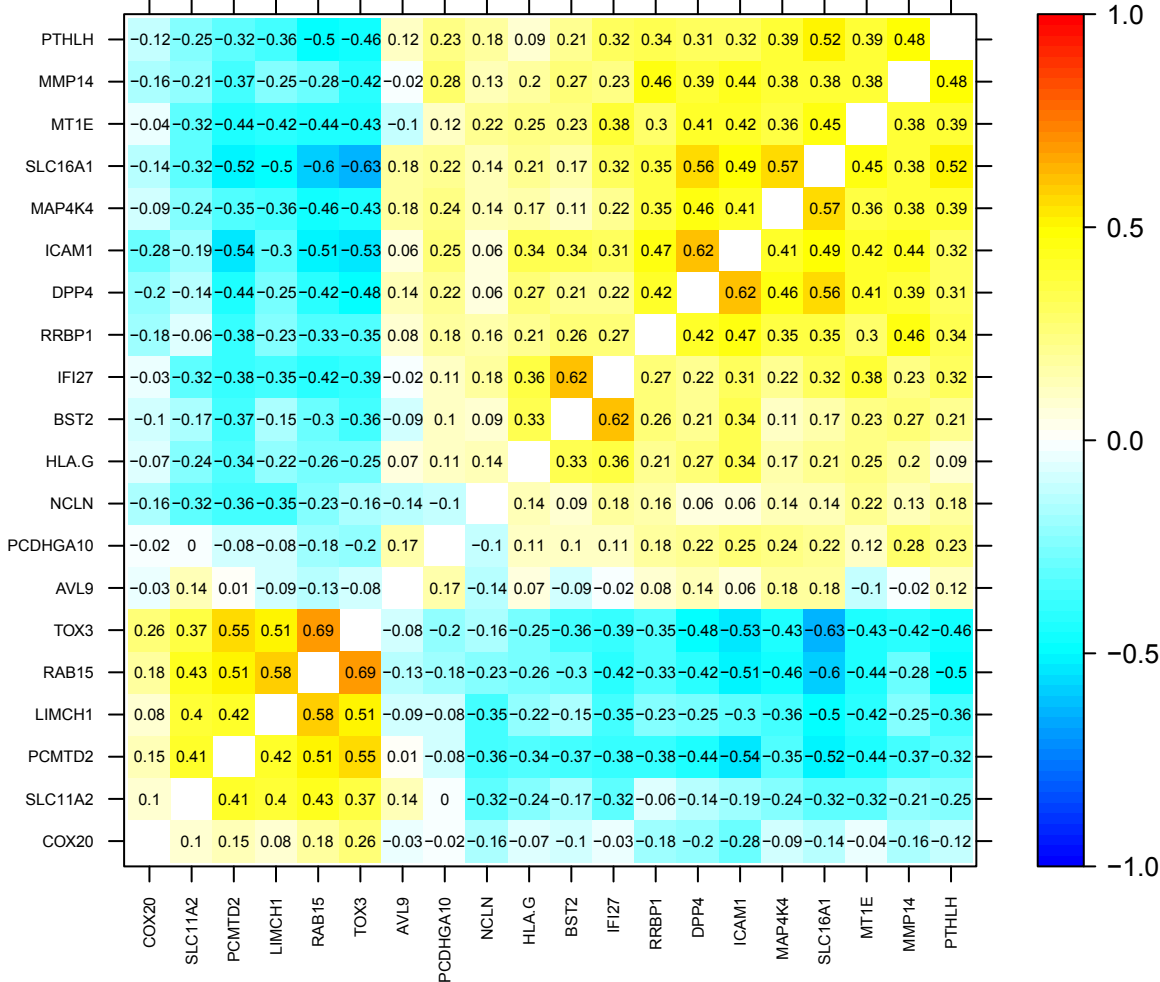

Supplement: pone.0174039.s005.pdf [file pone.0174039.s005.pdf]
